# Supplementary material for: Cyclopalladated complexes containing 2-C6R4PPh2 ligands (R = H, F): one-electron electrochemical reduction leading to metal–carbon σ-bond cleavage via palladium(i)
Source: Royal Society of Chemistry journal article supplement (doi:10.1039/c4dt03268c), 2015-01-01
Supplement: c4dt03268c1.pdf [file c4dt03268c1.pdf]

Supporting Information for

**Cyclopalladated Complexes Containing 2-C<sub>6</sub>R<sub>4</sub>PPh<sub>2</sub> Ligands (R = H, F): One-Electron Electrochemical Reduction Leading to Metal–Carbon  $\sigma$ -Bond Cleavage via Palladium(I)**

Gopa Kar, Steven H. Privér, Lathe A. Jones, Si-Xuan Guo, Angel A. J. Torriero, Alan M. Bond, Martin A. Bennett and Suresh K. Bhargava

All potentials are referenced to the DmFc<sup>0/+</sup> redox couple.

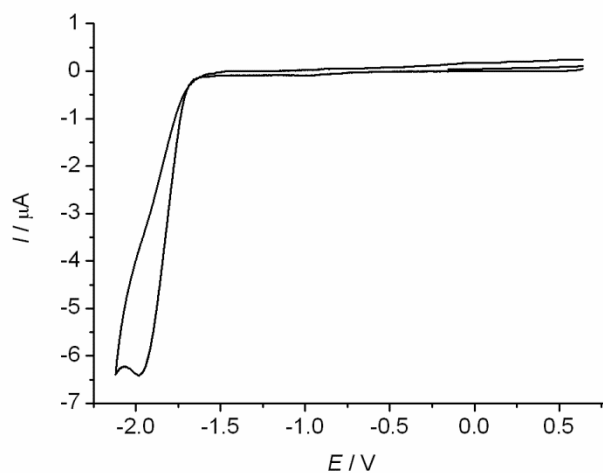

**Figure S1.** Cyclic voltammogram of a 1 mM solution of [PdBr(PPh<sub>3</sub>)(κ<sup>2</sup>-2-C<sub>6</sub>H<sub>4</sub>PPh<sub>2</sub>)] (**1**) in CH<sub>3</sub>CN containing 0.1 M [Bu<sub>4</sub>N][PF<sub>6</sub>] at a 1 mm diameter glassy carbon electrode. Scan rate: 100 mV s<sup>-1</sup>.

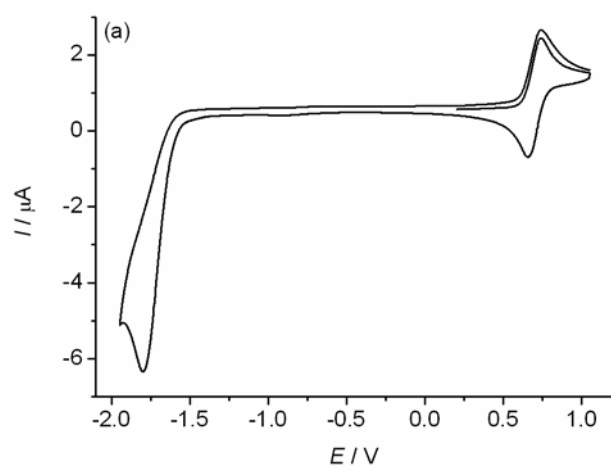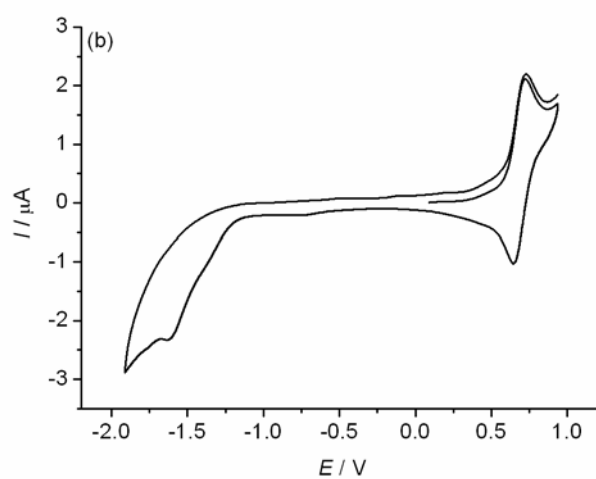

**Figure S2.** Cyclic voltammogram of a 1 mM solution of [PdBr(PPh<sub>2</sub>Fc)(κ<sup>2</sup>-2-C<sub>6</sub>H<sub>4</sub>PPh<sub>2</sub>)] (**2**) containing 0.1 M [Bu<sub>4</sub>N][PF<sub>6</sub>] at a 1 mm diameter glassy carbon electrode in (a) CH<sub>2</sub>Cl<sub>2</sub> and (b) CH<sub>3</sub>CN. Scan rate: 100 mV s<sup>-1</sup>.

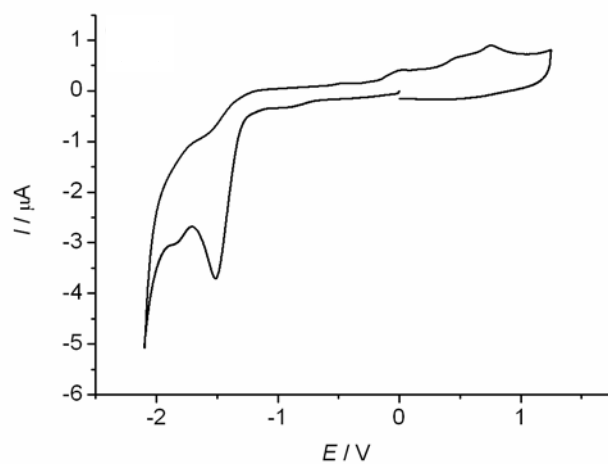

**Figure S3.** Cyclic voltammogram of 1 mM  $[\text{PdBr}(\text{PPh}_3)(\kappa^2\text{-2-C}_6\text{F}_4\text{PPh}_2)]$  (**4**) in  $\text{CH}_2\text{Cl}_2$  containing 0.1 M  $[\text{Bu}_4\text{N}][\text{PF}_6]$  at a 1 mm glassy carbon electrode. Scan rate:  $200 \text{ mV s}^{-1}$ .

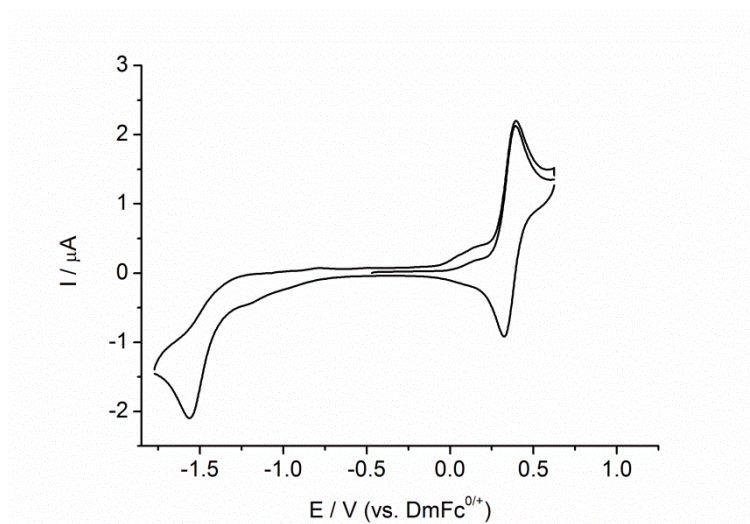

**Figure S4.** Cyclic voltammogram of a 1 mM solution of  $[\text{PdBr}(\text{PPh}_2\text{Fc})(\kappa^2\text{-2-C}_6\text{F}_4\text{PPh}_2)]$  (**5**) in  $\text{CH}_2\text{Cl}_2$  containing 0.1 M  $[\text{Bu}_4\text{N}][\text{PF}_6]$ . Scan rate:  $100 \text{ mV s}^{-1}$ .

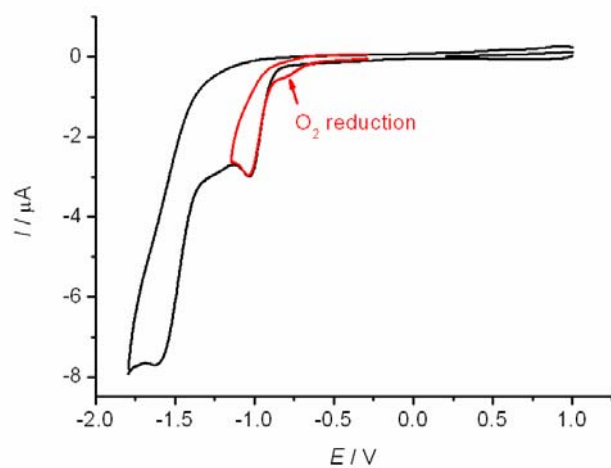

**Figure S5.** Cyclic voltammogram of a 1 mM solution of  $[\text{Pd}_2(\mu\text{-Br})_2(\kappa^2\text{-}2\text{-C}_6\text{F}_4\text{PPh}_2)_2]$  (**7**) in  $\text{CH}_2\text{Cl}_2$  containing 0.1 M  $[\text{Bu}_4\text{N}][\text{PF}_6]$ . Scan rate:  $100 \text{ mV s}^{-1}$ . Black trace: without the presence of oxygen, red trace: with the presence of oxygen.

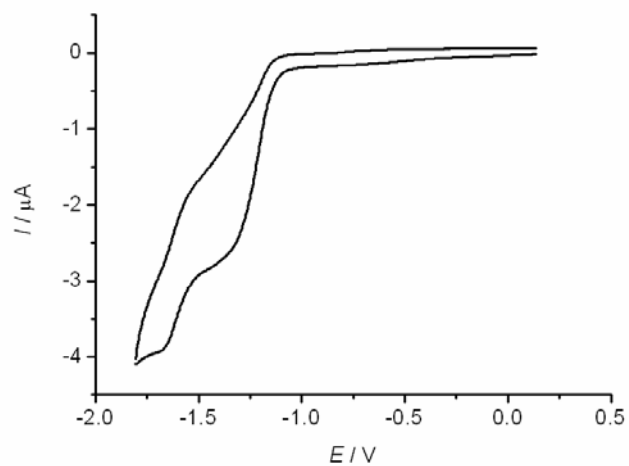

**Figure S6.** Cyclic voltammogram of a 0.7 mM solution of  $[\text{Pd}_2\text{Br}_2(\text{NCMe})_2(\mu\text{-}2\text{-C}_6\text{F}_4\text{PPh}_2)_2]$  (**9**) in  $\text{CH}_2\text{Cl}_2$  containing 0.1 M  $[\text{Bu}_4\text{N}][\text{PF}_6]$ . Scan rate:  $100 \text{ mV s}^{-1}$ .
